# Supplementary material
Source: publisher site journal article supplement (https://www.spandidos-publications.com/6998/downloadSupplementary)
Supplement: Supplementary file 1 [file downloadSupplementary]

## Sheet: SV. MSIPeak of each loci
Table SV. MSIPeak parameters of each locus in all included samples. MSI, microsatellite instabilty.
Sample no.	Site	t_depth	n_depth	shift_size	Distance	hindex_diff	Score	Status
18P	BAT25	3521	11463	0	0.0526	0.0364	0.0526	Stable
18P	BAT26	1380	320	0	0.0901	0.2345	0.2345	Stable
18P	NR21	1231	1604	0	0.0246	0.0062	0.0246	Stable
18P	NR24	72442	37977	0	0.0086	0.0019	0.0086	Stable
18P	MONO27	90492	43136	0	0.005	0.0039	0.005	Stable
19P	BAT25	5697	12489	0	0.0303	0.0441	0.0441	Stable
19P	BAT26	741	774	0	0.0353	0.0125	0.0353	Stable
19P	NR21	1356	2214	0	0.036	0.0304	0.036	Stable
19P	NR24	50867	38681	0	0.0054	0.0054	0.0054	Stable
19P	MONO27	62537	33547	0	0.0618	0.0431	0.0618	Stable
20P	BAT25	8803	3554	0	0.0857	0.1993	0.1993	Stable
20P	BAT26	855	833	2	0.2538	0.4443	2.4443	Unstable
20P	NR21	2017	1452	1	0.1701	0.2202	1.2202	Unstable
20P	NR24	65278	61113	0	0.1084	0.1345	0.1345	Stable
20P	MONO27	62211	45895	1	0.1971	0.2747	1.2747	Unstable
2100755-1	BAT25	1023	1442	1	0.0538	0.0204	1.0538	Stable
2100755-1	BAT26	1546	1358	0	0.0279	0.0284	0.0284	Stable
2100755-1	NR21	7791	10135	0	0.018	0.0176	0.018	Stable
2100755-1	NR24	44336	19388	0	0.0132	0.0113	0.0132	Stable
2100755-1	MONO27	89493	44032	0	0.0192	0.0201	0.0201	Stable
2101402-10	BAT25	947	1445	0	0.0487	0.1081	0.1081	Stable
2101402-10	BAT26	867	1412	0	0.0324	0.0008	0.0324	Stable
2101402-10	NR21	5165	7621	0	0.0581	0.21	0.21	Stable
2101402-10	NR24	30442	20030	0	0.0215	0.0218	0.0218	Stable
2101402-10	MONO27	81218	43102	0	0.0043	0.0036	0.0043	Stable
2101570-6	BAT25	1266	1563	0	0.0478	0.0078	0.0478	Stable
2101570-6	BAT26	1150	1049	0	0.0304	0.0026	0.0304	Stable
2101570-6	NR21	7197	7443	0	0.0187	0.0631	0.0631	Stable
2101570-6	NR24	14932	14796	0	0.0372	0.045	0.045	Stable
2101570-6	MONO27	52443	50488	0	0.0153	0.0296	0.0296	Stable
2101576-5	BAT25	1217	1185	0	0.0619	0.1119	0.1119	Stable
2101576-5	BAT26	1088	974	1	0.0393	0.0494	1.0494	Stable
2101576-5	NR21	7954	7618	0	0.0109	0.005	0.0109	Stable
2101576-5	NR24	27362	14206	0	0.0103	0.0072	0.0103	Stable
2101576-5	MONO27	65370	41411	0	0.0116	0.0135	0.0135	Stable
2101676-8	BAT25	951	1245	0	0.0318	0.0594	0.0594	Stable
2101676-8	BAT26	1252	831	1	0.0346	0.0666	1.0666	Stable
2101676-8	NR21	4874	4015	0	0.0212	0.0153	0.0212	Stable
2101676-8	NR24	30926	14141	0	0.0085	0.0063	0.0085	Stable
2101676-8	MONO27	84595	49167	0	0.0049	0.0399	0.0399	Stable
2101821-2	BAT25	1383	1428	0	0.0546	0.0383	0.0546	Stable
2101821-2	BAT26	1518	1324	0	0.0325	0.0478	0.0478	Stable
2101821-2	NR21	8237	6513	0	0.0129	0.0008	0.0129	Stable
2101821-2	NR24	28579	21053	0	0.0107	0.0023	0.0107	Stable
2101821-2	MONO27	65914	59164	0	0.0052	0.0008	0.0052	Stable
2103200-2	BAT25	1143	1595	0	0.0332	0.004	0.0332	Stable
2103200-2	BAT26	976	824	0	0.0521	0.1241	0.1241	Stable
2103200-2	NR21	7129	4753	0	0.0314	0.018	0.0314	Stable
2103200-2	NR24	24132	16897	0	0.0185	0.0158	0.0185	Stable
2103200-2	MONO27	87082	49849	0	0.0078	0.0077	0.0078	Stable
2103224-2	BAT25	1407	1514	0	0.027	0.0339	0.0339	Stable
2103224-2	BAT26	1193	1090	0	0.0176	0.0002	0.0176	Stable
2103224-2	NR21	5338	4401	0	0.0115	0.006	0.0115	Stable
2103224-2	NR24	19581	12673	0	0.0177	0.0158	0.0177	Stable
2103224-2	MONO27	70511	31880	0	0.0103	0.0518	0.0518	Stable
2104410-2	BAT25	1247	1637	0	0.0665	0.0231	0.0665	Stable
2104410-2	BAT26	1008	1074	1	0.0734	0.1053	1.1053	Unstable
2104410-2	NR21	7034	8925	0	0.0117	0.0012	0.0117	Stable
2104410-2	NR24	44432	30035	0	0.011	0.0059	0.011	Stable
2104410-2	MONO27	106438	117570	0	0.0048	0.0001	0.0048	Stable
2104957-8	BAT25	730	1382	0	0.0391	0.057	0.057	Stable
2104957-8	BAT26	575	1358	0	0.0595	0.099	0.099	Stable
2104957-8	NR21	6005	7336	0	0.0106	0.0173	0.0173	Stable
2104957-8	NR24	17195	31468	0	0.0098	0.0053	0.0098	Stable
2104957-8	MONO27	55299	60771	0	0.0082	0.0022	0.0082	Stable
2105386-15	BAT25	2541	2412	0	0.12	0.2848	0.2848	Stable
2105386-15	BAT26	790	917	4	0.1793	0.4611	4.4611	Unstable
2105386-15	NR21	6990	6830	1	0.1394	0.3045	1.3045	Unstable
2105386-15	NR24	27426	28587	0	0.0699	0.1479	0.1479	Stable
2105386-15	MONO27	28421	25018	0	0.0888	0.2443	0.2443	Stable
2105694-2	BAT25	4816	2672	0	0.0557	0.0794	0.0794	Stable
2105694-2	BAT26	714	858	1	0.1122	0.2856	1.2856	Unstable
2105694-2	NR21	10565	9735	0	0.0371	0.0176	0.0371	Stable
2105694-2	NR24	39823	33284	0	0.0227	0.0245	0.0245	Stable
2105694-2	MONO27	49944	46753	1	0.3353	0.287	1.3353	Unstable
2106351-2	BAT25	1514	1476	0	0.0612	0.0485	0.0612	Stable
2106351-2	BAT26	1021	905	0	0.0379	0.047	0.047	Stable
2106351-2	NR21	6315	7229	0	0.0145	0.009	0.0145	Stable
2106351-2	NR24	18950	12618	0	0.0241	0.0003	0.0241	Stable
2106351-2	MONO27	54557	50066	0	0.0058	0.0007	0.0058	Stable
2106614-1	BAT25	1970	2298	7	0.1715	0.2527	7.2527	Unstable
2106614-1	BAT26	434	429	7	0.1963	0.1078	7.1963	Unstable
2106614-1	NR21	4207	4674	0	0.0953	0.0017	0.0953	Stable
2106614-1	NR24	19038	20247	0	0.0255	0.0033	0.0255	Stable
2106614-1	MONO27	13784	13090	0	0.0808	0.0882	0.0882	Stable
2107379-7	BAT25	725	1321	0	0.038	0.024	0.038	Stable
2107379-7	BAT26	713	1319	0	0.0559	0.0362	0.0559	Stable
2107379-7	NR21	5044	9035	0	0.0198	0.0004	0.0198	Stable
2107379-7	NR24	15253	23502	0	0.0095	0.0064	0.0095	Stable
2107379-7	MONO27	61114	62706	0	0.0063	0.0024	0.0063	Stable
2107616-3	BAT25	2349	1576	0	0.0232	0.0044	0.0232	Stable
2107616-3	BAT26	1118	728	1	0.0258	0.002	1.0258	Stable
2107616-3	NR21	8159	7136	0	0.0107	0.0094	0.0107	Stable
2107616-3	NR24	26507	14266	0	0.0204	0.0028	0.0204	Stable
2107616-3	MONO27	94541	46426	0	0.0051	0.0011	0.0051	Stable
2108147-2	BAT25	1959	1581	0	0.0448	0.0011	0.0448	Stable
2108147-2	BAT26	2031	1259	1	0.032	0.04	1.04	Stable
2108147-2	NR21	10872	8632	1	0.0232	0.0033	1.0232	Stable
2108147-2	NR24	41754	25330	0	0.0155	0.0243	0.0243	Stable
2108147-2	MONO27	102798	52885	0	0.0087	0.023	0.023	Stable
2109122-5	BAT25	1062	1365	0	0.0461	0.0918	0.0918	Stable
2109122-5	BAT26	1278	779	0	0.033	0.0237	0.033	Stable
2109122-5	NR21	11612	11910	0	0.0125	0.0089	0.0125	Stable
2109122-5	NR24	26301	14528	0	0.0152	0.0144	0.0152	Stable
2109122-5	MONO27	81719	67948	0	0.0074	0.0101	0.0101	Stable
2109254-8	BAT25	1286	1925	0	0.0349	0.0087	0.0349	Stable
2109254-8	BAT26	1540	1495	0	0.0393	0.0378	0.0393	Stable
2109254-8	NR21	6291	6524	1	0.2518	0.0605	1.2518	Unstable
2109254-8	NR24	24609	14160	1	0.1527	0.0269	1.1527	Unstable
2109254-8	MONO27	65355	51739	2	0.2407	0.2209	2.2407	Unstable
2112455-4	BAT25	2086	1864	5	0.2414	0.5316	5.5316	Unstable
2112455-4	BAT26	1251	1046	4	0.3017	0.5294	4.5294	Unstable
2112455-4	NR21	6125	7841	1	0.1162	0.0722	1.1162	Unstable
2112455-4	NR24	22221	18764	1	0.2417	0.1041	1.2417	Unstable
2112455-4	MONO27	106116	65618	1	0.0745	0.1303	1.1303	Unstable
2112955-2	BAT25	1248	1643	0	0.1126	0.2917	0.2917	Stable
2112955-2	BAT26	1404	1331	0	0.0902	0.1728	0.1728	Stable
2112955-2	NR21	9113	7630	1	0.0802	0.1064	1.1064	Unstable
2112955-2	NR24	38451	18988	0	0.1213	0.1919	0.1919	Stable
2112955-2	MONO27	96897	50417	0	0.0366	0.0237	0.0366	Stable
2112976-5	BAT25	1370	2622	1	0.2592	0.0189	1.2592	Unstable
2112976-5	BAT26	1250	1401	1	0.0752	0.0507	1.0752	Stable
2112976-5	NR21	8149	14294	0	0.0074	0.0018	0.0074	Stable
2112976-5	NR24	25364	17731	0	0.0201	0.0278	0.0278	Stable
2112976-5	MONO27	71030	98215	0	0.0083	0.0059	0.0083	Stable
2114543-2	BAT25	1991	901	0	0.0546	0.1093	0.1093	Stable
2114543-2	BAT26	1473	832	0	0.0548	0.057	0.057	Stable
2114543-2	NR21	6266	4312	0	0.0408	0.0303	0.0408	Stable
2114543-2	NR24	36149	27066	0	0.0175	0.03	0.03	Stable
2114543-2	MONO27	116654	54866	0	0.0225	0.0285	0.0285	Stable
2114645-5	BAT25	3193	2737	1	0.0859	0.1912	1.1912	Unstable
2114645-5	BAT26	875	845	1	0.1445	0.4338	1.4338	Unstable
2114645-5	NR21	7793	5785	1	0.1182	0.357	1.357	Unstable
2114645-5	NR24	27431	21433	0	0.0245	0.0714	0.0714	Stable
2114645-5	MONO27	32758	31768	0	0.0513	0.1429	0.1429	Stable
2115207-5	BAT25	1179	1320	4	0.1252	0.3228	4.3228	Unstable
2115207-5	BAT26	2130	947	8	0.2769	0.5783	8.5783	Unstable
2115207-5	NR21	7131	6923	6	0.1196	0.4081	6.4081	Unstable
2115207-5	NR24	18772	18700	4	0.1171	0.4322	4.4322	Unstable
2115207-5	MONO27	57717	48820	8	0.0769	0.3271	8.3271	Unstable
2117885-5	BAT25	2920	3230	1	0.0588	0.1809	1.1809	Unstable
2117885-5	BAT26	704	777	0	0.0543	0.1478	0.1478	Stable
2117885-5	NR21	6506	4983	1	0.0253	0.0427	1.0427	Stable
2117885-5	NR24	28631	23873	0	0.0097	0.0133	0.0133	Stable
2117885-5	MONO27	49757	32881	0	0.0275	0.0464	0.0464	Stable
2118981-1	BAT25	2960	1729	0	0.026	0.0001	0.026	Stable
2118981-1	BAT26	1847	1137	0	0.0454	0.0638	0.0638	Stable
2118981-1	NR21	15284	10490	0	0.023	0.0178	0.023	Stable
2118981-1	NR24	32003	27084	0	0.0356	0.0417	0.0417	Stable
2118981-1	MONO27	127541	61724	0	0.0112	0.0432	0.0432	Stable
2119192-15	BAT25	2490	1965	0	0.0725	0.2279	0.2279	Stable
2119192-15	BAT26	1629	966	7	0.1556	0.4693	7.4693	Unstable
2119192-15	NR21	14238	7763	0	0.0119	0.0095	0.0119	Stable
2119192-15	NR24	35791	20976	0	0.0953	0.2734	0.2734	Stable
2119192-15	MONO27	113332	67749	0	0.0377	0.1197	0.1197	Stable
2119672-12	BAT25	512	818	0	0.0417	0.0985	0.0985	Stable
2119672-12	BAT26	327	401	1	0.0546	0.0845	1.0845	Stable
2119672-12	NR21	3546	2879	1	0.0149	0.0449	1.0449	Stable
2119672-12	NR24	17718	18582	0	0.005	0.0021	0.005	Stable
2119672-12	MONO27	51449	60608	0	0.0055	0.0021	0.0055	Stable
2120354-9	BAT25	6356	4199	0	0.2047	0.1648	0.2047	Stable
2120354-9	BAT26	357	181	1	0.2441	0.0476	1.2441	Unstable
2120354-9	NR21	1587	1072	0	0.1118	0.0779	0.1118	Stable
2120354-9	NR24	64049	53869	0	0.0906	0.0225	0.0906	Stable
2120354-9	MONO27	107998	74402	1	0.2244	0.073	1.2244	Unstable
2120399-7	BAT25	1088	1793	3	0.344	0.3001	3.344	Unstable
2120399-7	BAT26	782	1351	3	0.2232	0.3555	3.3555	Unstable
2120399-7	NR21	4759	9013	1	1.1225	0.2379	2.1225	Unstable
2120399-7	NR24	21175	20380	1	0.1391	0.4626	1.4626	Unstable
2120399-7	MONO27	74383	56157	1	0.2264	0.7484	1.7484	Unstable
2121315-6	BAT25	3765	3616	0	0.0374	0.0002	0.0374	Stable
2121315-6	BAT26	236	243	0	0.0958	0.1089	0.1089	Stable
2121315-6	NR21	802	959	0	0.0477	0.042	0.0477	Stable
2121315-6	NR24	45050	47255	0	0.0106	0.011	0.011	Stable
2121315-6	MONO27	65119	66009	0	0.011	0.0004	0.011	Stable
2121324-6	BAT25	1429	2489	0	0.0422	0.1237	0.1237	Stable
2121324-6	BAT26	503	765	0	0.0423	0.0441	0.0441	Stable
2121324-6	NR21	4616	5749	0	0.0362	0.0746	0.0746	Stable
2121324-6	NR24	25250	22851	0	0.0199	0.061	0.061	Stable
2121324-6	MONO27	23369	31545	0	0.0168	0.0427	0.0427	Stable
2121424-7	BAT25	2195	3827	0	0.0271	0.0179	0.0271	Stable
2121424-7	BAT26	133	142	0	0.1164	0.1549	0.1549	Stable
2121424-7	NR21	628	931	0	0.0336	0.0161	0.0336	Stable
2121424-7	NR24	29332	34974	0	0.007	0.0038	0.007	Stable
2121424-7	MONO27	42729	32286	0	0.008	0.0097	0.0097	Stable
2121745-4	BAT25	5687	2792	0	0.0157	0.0243	0.0243	Stable
2121745-4	BAT26	307	285	0	0.0789	0.0293	0.0789	Stable
2121745-4	NR21	1306	802	1	0.0247	0.0058	1.0247	Stable
2121745-4	NR24	34387	43499	0	0.0171	0.0128	0.0171	Stable
2121745-4	MONO27	38029	57253	0	0.0132	0.0643	0.0643	Stable
2122236-2	BAT25	1366	1399	0	0.023	0.0324	0.0324	Stable
2122236-2	BAT26	1031	968	0	0.0566	0.174	0.174	Stable
2122236-2	NR21	6869	8523	1	0.0159	0.0235	1.0235	Stable
2122236-2	NR24	18396	18683	0	0.0062	0.002	0.0062	Stable
2122236-2	MONO27	47312	44198	0	0.0085	0.0037	0.0085	Stable
2122474-5	BAT25	1494	1970	0	0.0823	0.1902	0.1902	Stable
2122474-5	BAT26	636	565	0	0.119	0.2409	0.2409	Stable
2122474-5	NR21	5838	5090	0	0.033	0.0752	0.0752	Stable
2122474-5	NR24	28775	28383	0	0.0536	0.1141	0.1141	Stable
2122474-5	MONO27	34456	24408	1	0.0338	0.0713	1.0713	Stable
2123754-1	BAT25	4851	3715	0	0.0237	0.0791	0.0791	Stable
2123754-1	BAT26	220	223	1	0.1501	0.1659	1.1659	Unstable
2123754-1	NR21	1150	823	0	0.0533	0.0608	0.0608	Stable
2123754-1	NR24	38145	31806	0	0.0317	0.01	0.0317	Stable
2123754-1	MONO27	46791	31159	0	0.0327	0.0576	0.0576	Stable
2123975-1	BAT25	4012	3643	0	0.0165	0.0149	0.0165	Stable
2123975-1	BAT26	279	292	1	0.0942	0.0736	1.0942	Stable
2123975-1	NR21	859	1198	0	0.0394	0.0157	0.0394	Stable
2123975-1	NR24	42720	46426	0	0.0072	0.0027	0.0072	Stable
2123975-1	MONO27	54880	56271	0	0.0088	0.0079	0.0088	Stable
2124496-1	BAT25	4782	5202	0	0.0138	0.0008	0.0138	Stable
2124496-1	BAT26	245	387	1	0.0678	0.0252	1.0678	Stable
2124496-1	NR21	1161	1024	1	0.0482	0.1384	1.1384	Unstable
2124496-1	NR24	33869	48754	0	0.0055	0.0487	0.0487	Stable
2124496-1	MONO27	42039	50295	0	0.0099	0.0447	0.0447	Stable
2125583-6	BAT25	729	1100	1	0.0685	0.13	1.13	Unstable
2125583-6	BAT26	777	933	1	0.0688	0.0898	1.0898	Stable
2125583-6	NR21	5413	6742	1	0.0268	0.0474	1.0474	Stable
2125583-6	NR24	12013	17629	0	0.0125	0.0074	0.0125	Stable
2125583-6	MONO27	52975	56171	0	0.0238	0.0263	0.0263	Stable
2125702-2	BAT25	2460	2835	0	0.0331	0.0085	0.0331	Stable
2125702-2	BAT26	352	277	0	0.0463	0.058	0.058	Stable
2125702-2	NR21	775	894	0	0.0452	0.0105	0.0452	Stable
2125702-2	NR24	47992	42490	0	0.0116	0.013	0.013	Stable
2125702-2	MONO27	64347	50729	0	0.0115	0.01	0.0115	Stable
2125829-1	BAT25	3788	2305	0	0.0851	0.27	0.27	Stable
2125829-1	BAT26	224	222	0	0.1172	0.0705	0.1172	Stable
2125829-1	NR21	989	736	1	0.0395	0.0964	1.0964	Stable
2125829-1	NR24	53691	42409	0	0.0323	0.0954	0.0954	Stable
2125829-1	MONO27	60610	42234	0	0.0536	0.0871	0.0871	Stable
2126093-5	BAT25	2190	3965	0	0.0274	0.0099	0.0274	Stable
2126093-5	BAT26	275	186	1	0.1305	0.1191	1.1305	Unstable
2126093-5	NR21	753	635	0	0.0712	0.0538	0.0712	Stable
2126093-5	NR24	51582	37504	0	0.0077	0.0353	0.0353	Stable
2126093-5	MONO27	49308	42225	0	0.009	0.0003	0.009	Stable
2126297-5	BAT25	6427	7426	0	0.0067	0.0044	0.0067	Stable
2126297-5	BAT26	186	223	1	0.0766	0.0205	1.0766	Stable
2126297-5	NR21	661	1144	0	0.0412	0.0401	0.0412	Stable
2126297-5	NR24	31707	28852	0	0.0081	0.0009	0.0081	Stable
2126297-5	MONO27	63542	52710	0	0.0086	0.0526	0.0526	Stable
2126326-7	BAT25	3182	3724	0	0.0175	0.0014	0.0175	Stable
2126326-7	BAT26	370	251	0	0.0609	0.0304	0.0609	Stable
2126326-7	NR21	788	607	0	0.0698	0.2029	0.2029	Stable
2126326-7	NR24	57398	32114	0	0.0051	0.0456	0.0456	Stable
2126326-7	MONO27	67822	31669	0	0.0046	0.0332	0.0332	Stable
2126358-5	BAT25	6558	3491	0	0.0253	0.0356	0.0356	Stable
2126358-5	BAT26	341	322	0	0.0893	0.0555	0.0893	Stable
2126358-5	NR21	872	557	0	0.0746	0.2212	0.2212	Stable
2126358-5	NR24	33511	44784	0	0.0118	0.0612	0.0612	Stable
2126358-5	MONO27	59356	95592	0	0.0179	0.0277	0.0277	Stable
2127218-5	BAT25	1278	1808	0	0.1125	0.1497	0.1497	Stable
2127218-5	BAT26	1899	1324	2	0.2054	0.2525	2.2525	Unstable
2127218-5	NR21	8445	7599	1	0.1772	0.2666	1.2666	Unstable
2127218-5	NR24	27362	15979	1	0.1529	0.1706	1.1706	Unstable
2127218-5	MONO27	64884	61467	1	0.1602	0.2905	1.2905	Unstable
2127332-5	BAT25	2288	3243	1	0.2739	0.3305	1.3305	Unstable
2127332-5	BAT26	1338	1225	7	0.3978	0.5444	7.5444	Unstable
2127332-5	NR21	6437	8242	5	0.266	0.4617	5.4617	Unstable
2127332-5	NR24	22551	48052	0	0.186	0.2912	0.2912	Stable
2127332-5	MONO27	25514	76290	10	0.3598	0.6385	10.6385	Unstable
2127501-6	BAT25	6038	8117	0	0.0177	0.0166	0.0177	Stable
2127501-6	BAT26	82	293	0	0.0458	0.0189	0.0458	Stable
2127501-6	NR21	901	1110	1	0.0383	0.022	1.0383	Stable
2127501-6	NR24	25144	28980	0	0.003	0.0425	0.0425	Stable
2127501-6	MONO27	62844	51851	0	0.0075	0.0053	0.0075	Stable
2128435-5	BAT25	4098	2641	5	0.126	0.3242	5.3242	Unstable
2128435-5	BAT26	868	560	6	0.1421	0.4459	6.4459	Unstable
2128435-5	NR21	7620	4608	6	0.1332	0.3755	6.3755	Unstable
2128435-5	NR24	27217	20224	0	0.0562	0.1118	0.1118	Stable
2128435-5	MONO27	40766	28192	0	0.0477	0.1368	0.1368	Stable
2128916-6	BAT25	3146	4971	0	0.033	0.0028	0.033	Stable
2128916-6	BAT26	58	201	0	0.0158	0.0089	0.0158	Stable
2128916-6	NR21	344	700	0	0.0675	0.0976	0.0976	Stable
2128916-6	NR24	49602	59763	0	0.0034	0.0069	0.0069	Stable
2128916-6	MONO27	109513	110661	0	0.0034	0.0413	0.0413	Stable
2129804-36	BAT25	1555	1860	0	0.0281	0.0174	0.0281	Stable
2129804-36	BAT26	1676	1215	0	0.0234	0.0263	0.0263	Stable
2129804-36	NR21	6932	9917	0	0.0132	0.006	0.0132	Stable
2129804-36	NR24	23071	17655	0	0.0138	0.0079	0.0138	Stable
2129804-36	MONO27	110428	66973	0	0.0065	0.002	0.0065	Stable
2129902-10	BAT25	1701	2051	0	0.019	0.0619	0.0619	Stable
2129902-10	BAT26	1060	1036	0	0.0215	0.0208	0.0215	Stable
2129902-10	NR21	7711	9059	0	0.0174	0.0078	0.0174	Stable
2129902-10	NR24	30035	16164	0	0.0094	0.0081	0.0094	Stable
2129902-10	MONO27	81064	43487	0	0.0065	0.0096	0.0096	Stable
2130197-6	BAT25	7575	8458	0	0.008	0.0144	0.0144	Stable
2130197-6	BAT26	459	279	0	0.0664	0.0156	0.0664	Stable
2130197-6	NR21	1407	1365	1	0.0549	0.0301	1.0549	Stable
2130197-6	NR24	38472	21367	0	0.0203	0.0546	0.0546	Stable
2130197-6	MONO27	60329	56131	0	0.0052	0.0044	0.0052	Stable
21P	BAT25	4630	9974	0	0.0154	0.0166	0.0166	Stable
21P	BAT26	387	383	1	0.0664	0.0781	1.0781	Stable
21P	NR21	676	893	0	0.0363	0.1088	0.1088	Stable
21P	NR24	50258	58744	0	0.0147	0.0083	0.0147	Stable
21P	MONO27	66972	60735	0	0.0089	0.0048	0.0089	Stable
2200721-5	BAT25	1650	1483	0	0.0229	0.0447	0.0447	Stable
2200721-5	BAT26	1255	890	0	0.0341	0.0153	0.0341	Stable
2200721-5	NR21	8529	6723	0	0.0178	0.0059	0.0178	Stable
2200721-5	NR24	17288	19020	0	0.0163	0.0023	0.0163	Stable
2200721-5	MONO27	76799	54016	0	0.0114	0.0187	0.0187	Stable
2201054-3	BAT25	3499	3716	0	0.0364	0.066	0.066	Stable
2201054-3	BAT26	87	192	0	0.0616	0.0315	0.0616	Stable
2201054-3	NR21	252	620	0	0.0964	0.0666	0.0964	Stable
2201054-3	NR24	30187	32339	0	0.0101	0.0038	0.0101	Stable
2201054-3	MONO27	61049	49614	0	0.0064	0.0044	0.0064	Stable
2201191-4	BAT25	1207	1753	0	0.0203	0.0603	0.0603	Stable
2201191-4	BAT26	1259	1301	0	0.0216	0.0305	0.0305	Stable
2201191-4	NR21	6755	9232	0	0.0155	0.0127	0.0155	Stable
2201191-4	NR24	24217	16897	0	0.023	0.0217	0.023	Stable
2201191-4	MONO27	84177	71084	0	0.0108	0.0169	0.0169	Stable
2201703-5	BAT25	1270	2485	0	0.0162	0.0102	0.0162	Stable
2201703-5	BAT26	1677	1508	0	0.0488	0.0279	0.0488	Stable
2201703-5	NR21	6237	12266	0	0.0195	0.023	0.023	Stable
2201703-5	NR24	25283	24092	0	0.0132	0.01	0.0132	Stable
2201703-5	MONO27	91703	67976	0	0.0058	0.0346	0.0346	Stable
2201807-9	BAT25	5904	6169	0	0.0183	0.0102	0.0183	Stable
2201807-9	BAT26	166	263	1	0.136	0.1605	1.1605	Unstable
2201807-9	NR21	837	800	0	0.0336	0.0687	0.0687	Stable
2201807-9	NR24	24682	27145	0	0.013	0.0087	0.013	Stable
2201807-9	MONO27	48429	34501	0	0.0106	0.0581	0.0581	Stable
2202205-3	BAT25	5470	4382	0	0.0219	0.0261	0.0261	Stable
2202205-3	BAT26	370	261	1	0.0771	0.1715	1.1715	Unstable
2202205-3	NR21	713	748	1	0.0351	0.0132	1.0351	Stable
2202205-3	NR24	40738	24598	0	0.0068	0.0119	0.0119	Stable
2202205-3	MONO27	52335	32118	0	0.0074	0.0025	0.0074	Stable
2202360-12	BAT25	936	6735	0	0.0617	0.0217	0.0617	Stable
2202360-12	BAT26	80	236	0	0.0606	0.0734	0.0734	Stable
2202360-12	NR21	439	985	0	0.0927	0.0031	0.0927	Stable
2202360-12	NR24	12485	29647	0	0.0258	0.0624	0.0624	Stable
2202360-12	MONO27	13510	45090	1	0.0285	0.0358	1.0358	Stable
2203032-7	BAT25	4942	987	7	0.4538	0.5847	7.5847	Unstable
2203032-7	BAT26	12462	641	11	0.6063	0.0634	11.6063	Unstable
2203032-7	NR21	16660	4345	6	0.5254	0.3971	6.5254	Unstable
2203032-7	NR24	31009	38996	9	0.3489	0.882	9.882	Unstable
2203032-7	MONO27	30544	39220	7	0.2563	0.6131	7.6131	Unstable
2203579-3	BAT25	3442	5023	0	0.0375	0.0743	0.0743	Stable
2203579-3	BAT26	278	177	0	0.0927	0.2467	0.2467	Stable
2203579-3	NR21	674	504	0	0.0578	0.1271	0.1271	Stable
2203579-3	NR24	41772	24427	0	0.0446	0.105	0.105	Stable
2203579-3	MONO27	70824	40142	0	0.0354	0.1283	0.1283	Stable
2203705-5	BAT25	917	1743	0	0.0539	0.0979	0.0979	Stable
2203705-5	BAT26	1070	823	1	0.1152	0.2113	1.2113	Unstable
2203705-5	NR21	6933	9947	1	0.0176	0.0223	1.0223	Stable
2203705-5	NR24	35171	24951	0	0.0357	0.0436	0.0436	Stable
2203705-5	MONO27	64541	81237	1	0.0511	0.0675	1.0675	Stable
2204584-8	BAT25	1372	2104	1	0.0434	0.0176	1.0434	Stable
2204584-8	BAT26	1254	914	0	0.0482	0.0018	0.0482	Stable
2204584-8	NR21	6395	8744	0	0.0097	0.0171	0.0171	Stable
2204584-8	NR24	41402	18636	0	0.0251	0.0075	0.0251	Stable
2204584-8	MONO27	104001	58929	0	0.0154	0.0077	0.0154	Stable
2205038-4	BAT25	3403	8103	0	0.0187	0.032	0.032	Stable
2205038-4	BAT26	286	219	0	0.0691	0.1223	0.1223	Stable
2205038-4	NR21	1308	2952	0	0.0272	0.0411	0.0411	Stable
2205038-4	NR24	35574	13361	0	0.0115	0.0179	0.0179	Stable
2205038-4	MONO27	72578	24736	0	0.0183	0.0243	0.0243	Stable
2205876-6	BAT25	2512	3569	0	0.0189	0.0247	0.0247	Stable
2205876-6	BAT26	770	626	1	0.0316	0.0294	1.0316	Stable
2205876-6	NR21	4093	5226	0	0.026	0.0495	0.0495	Stable
2205876-6	NR24	27474	16368	0	0.0222	0.0305	0.0305	Stable
2205876-6	MONO27	34504	33351	0	0.0164	0.0637	0.0637	Stable
2206205-7	BAT25	3314	6124	0	0.0272	0.0237	0.0272	Stable
2206205-7	BAT26	152	292	0	0.0952	0.2899	0.2899	Stable
2206205-7	NR21	632	919	0	0.0509	0.0593	0.0593	Stable
2206205-7	NR24	39283	25670	0	0.0213	0.0626	0.0626	Stable
2206205-7	MONO27	60605	41068	1	0.0077	0.0063	1.0077	Stable
2206554-11	BAT25	4559	4866	1	0.2646	0.0466	1.2646	Unstable
2206554-11	BAT26	131	264	1	0.09	0.0792	1.09	Stable
2206554-11	NR21	615	822	0	0.0334	0.0487	0.0487	Stable
2206554-11	NR24	38737	26848	0	0.1455	0.1187	0.1455	Stable
2206554-11	MONO27	86316	41493	0	0.1156	0.0696	0.1156	Stable
2207154-3	BAT25	5263	4204	0	0.0381	0.0498	0.0498	Stable
2207154-3	BAT26	185	123	4	0.075	0.1289	4.1289	Unstable
2207154-3	NR21	805	697	0	0.0684	0.1059	0.1059	Stable
2207154-3	NR24	52533	39864	0	0.0175	0.006	0.0175	Stable
2207154-3	MONO27	89484	43178	0	0.0079	0.0518	0.0518	Stable
2207237-5	BAT25	2890	1491	1	0.1852	0.1627	1.1852	Unstable
2207237-5	BAT26	534	429	2	0.2298	0.4109	2.4109	Unstable
2207237-5	NR21	6532	3325	2	0.1907	0.2318	2.2318	Unstable
2207237-5	NR24	23898	39077	1	0.2072	0.1376	1.2072	Unstable
2207237-5	MONO27	38769	32811	7	0.189	0.3011	7.3011	Unstable
2207384-2	BAT25	1393	1665	1	0.1649	0.046	1.1649	Unstable
2207384-2	BAT26	1243	1014	0	0.1191	0.0358	0.1191	Stable
2207384-2	NR21	4651	5976	0	0.0115	0.002	0.0115	Stable
2207384-2	NR24	21703	15219	1	0.1606	0.0301	1.1606	Unstable
2207384-2	MONO27	72420	70574	3	0.4646	0.0354	3.4646	Unstable
2208071-8	BAT25	3415	2893	0	0.0257	0.0228	0.0257	Stable
2208071-8	BAT26	175	147	0	0.1243	0.1875	0.1875	Stable
2208071-8	NR21	571	475	0	0.0433	0.009	0.0433	Stable
2208071-8	NR24	32388	28734	0	0.0193	0.0497	0.0497	Stable
2208071-8	MONO27	48540	46872	0	0.0186	0.0174	0.0186	Stable
2208154-4	BAT25	4121	2243	0	0.0176	0.0127	0.0176	Stable
2208154-4	BAT26	221	249	0	0.0952	0.0891	0.0952	Stable
2208154-4	NR21	670	492	0	0.0666	0.1292	0.1292	Stable
2208154-4	NR24	54323	45730	0	0.0164	0.0205	0.0205	Stable
2208154-4	MONO27	84204	54470	0	0.009	0.0121	0.0121	Stable
2208401-4	BAT25	2871	5225	0	0.0157	0.0218	0.0218	Stable
2208401-4	BAT26	239	143	0	0.1485	0.3291	0.3291	Stable
2208401-4	NR21	633	436	0	0.0302	0.0284	0.0302	Stable
2208401-4	NR24	34688	31460	0	0.0164	0.0237	0.0237	Stable
2208401-4	MONO27	53956	51539	0	0.0149	0.0148	0.0149	Stable
2208788-4	BAT25	2840	3063	4	0.2506	0.4806	4.4806	Unstable
2208788-4	BAT26	5170	514	7	0.5175	0.2713	7.5175	Unstable
2208788-4	NR21	7476	4710	5	0.3542	0.5172	5.5172	Unstable
2208788-4	NR24	25278	20645	10	0.2938	0.9205	10.9205	Unstable
2208788-4	MONO27	28883	33590	9	0.246	0.6706	9.6706	Unstable
2208912-3	BAT25	3045	5292	0	0.0121	0.0051	0.0121	Stable
2208912-3	BAT26	276	221	1	0.1194	0.0514	1.1194	Unstable
2208912-3	NR21	596	707	1	0.0625	0.0492	1.0625	Stable
2208912-3	NR24	45018	36030	0	0.0136	0.063	0.063	Stable
2208912-3	MONO27	62362	44345	0	0.0096	0.0069	0.0096	Stable
2209344-12	BAT25	3769	5208	0	0.0229	0.0173	0.0229	Stable
2209344-12	BAT26	235	304	0	0.0803	0.2362	0.2362	Stable
2209344-12	NR21	738	769	0	0.0436	0.0056	0.0436	Stable
2209344-12	NR24	63554	60606	0	0.0056	0.006	0.006	Stable
2209344-12	MONO27	124366	119168	0	0.005	0.0022	0.005	Stable
2209929-6	BAT25	2116	2175	1	0.1525	0.6322	1.6322	Unstable
2209929-6	BAT26	2694	637	11	0.505	0.5761	11.5761	Unstable
2209929-6	NR21	5189	5953	7	0.1868	0.6194	7.6194	Unstable
2209929-6	NR24	38836	24716	0	0.0983	0.4803	0.4803	Stable
2209929-6	MONO27	43352	34449	0	0.0714	0.3427	0.3427	Stable
2210007-6	BAT25	4288	5389	0	0.026	0.0261	0.0261	Stable
2210007-6	BAT26	184	219	1	0.0858	0.0828	1.0858	Stable
2210007-6	NR21	730	777	0	0.0523	0.0277	0.0523	Stable
2210007-6	NR24	38389	30449	0	0.0076	0.0053	0.0076	Stable
2210007-6	MONO27	75149	60989	0	0.0116	0.0102	0.0116	Stable
2210082-1	BAT25	6274	9549	0	0.0199	0.0167	0.0199	Stable
2210082-1	BAT26	353	155	0	0.1139	0.2556	0.2556	Stable
2210082-1	NR21	721	867	1	0.0475	0.0001	1.0475	Stable
2210082-1	NR24	41540	27464	0	0.0078	0.002	0.0078	Stable
2210082-1	MONO27	89985	70386	0	0.0144	0.01	0.0144	Stable
2210085-1	BAT25	2496	3259	0	0.1337	0.2048	0.2048	Stable
2210085-1	BAT26	872	738	1	0.1558	0.1785	1.1785	Unstable
2210085-1	NR21	13384	14375	0	0.0994	0.1217	0.1217	Stable
2210085-1	NR24	26173	25364	0	0.1093	0.1114	0.1114	Stable
2210085-1	MONO27	27307	31716	1	0.1219	0.0986	1.1219	Unstable
2210522-1	BAT25	3065	4580	0	0.0137	0.0092	0.0137	Stable
2210522-1	BAT26	235	236	1	0.0666	0.0917	1.0917	Stable
2210522-1	NR21	460	640	0	0.0506	0.0029	0.0506	Stable
2210522-1	NR24	42212	33838	0	0.0183	0.0022	0.0183	Stable
2210522-1	MONO27	55658	39299	0	0.0163	0.0123	0.0163	Stable
2214740-4	BAT25	9285	6187	0	0.011	0.0111	0.0111	Stable
2214740-4	BAT26	449	158	1	0.1064	0.2421	1.2421	Unstable
2214740-4	NR21	1610	876	1	0.0525	0.0439	1.0525	Stable
2214740-4	NR24	41834	32054	0	0.0064	0.0347	0.0347	Stable
2214740-4	MONO27	97668	53035	0	0.0089	0.0084	0.0089	Stable
2215007-5	BAT25	5858	5225	0	0.1338	0.0207	0.1338	Stable
2215007-5	BAT26	635	274	3	0.3661	0.4124	3.4124	Unstable
2215007-5	NR21	1047	810	1	0.2201	0.1865	1.2201	Unstable
2215007-5	NR24	40015	27202	1	0.1048	0.1059	1.1059	Unstable
2215007-5	MONO27	58178	47974	3	0.2802	0.2514	3.2802	Unstable
2215078-3	BAT25	1590	2363	0	0.0759	0.2255	0.2255	Stable
2215078-3	BAT26	1229	1061	0	0.0795	0.2767	0.2767	Stable
2215078-3	NR21	8304	10138	0	0.067	0.142	0.142	Stable
2215078-3	NR24	14794	11337	0	0.0439	0.0766	0.0766	Stable
2215078-3	MONO27	41670	39554	0	0.0545	0.1432	0.1432	Stable
2215115-13	BAT25	6240	7058	0	0.0957	0.2042	0.2042	Stable
2215115-13	BAT26	537	314	5	0.2403	0.7559	5.7559	Unstable
2215115-13	NR21	1246	1127	1	0.0761	0.1475	1.1475	Unstable
2215115-13	NR24	43480	34268	0	0.0433	0.1112	0.1112	Stable
2215115-13	MONO27	65130	52030	0	0.0783	0.2381	0.2381	Stable
2215529-8	BAT25	3738	2034	1	0.1261	0.1074	1.1261	Unstable
2215529-8	BAT26	1825	1825	0	0.0299	0.0117	0.0299	Stable
2215529-8	NR21	8893	12272	0	0.0147	0.0168	0.0168	Stable
2215529-8	NR24	23969	18526	0	0.0122	0.011	0.0122	Stable
2215529-8	MONO27	52633	52740	0	0.0094	0.0107	0.0107	Stable
2216304-3	BAT25	2066	1815	0	0.0197	0.0492	0.0492	Stable
2216304-3	BAT26	1521	985	0	0.0389	0.0395	0.0395	Stable
2216304-3	NR21	11058	10746	1	0.0261	0	1.0261	Stable
2216304-3	NR24	20900	18601	0	0.0079	0.0084	0.0084	Stable
2216304-3	MONO27	92391	60155	0	0.0065	0.0328	0.0328	Stable
2218475-5	BAT25	6019	2939	6	0.2654	0.6743	6.6743	Unstable
2218475-5	BAT26	214	153	1	0.1322	0.1425	1.1425	Unstable
2218475-5	NR21	790	373	3	0.1748	0.3615	3.3615	Unstable
2218475-5	NR24	45969	39332	0	0.0932	0.279	0.279	Stable
2218475-5	MONO27	66017	66960	0	0.0984	0.215	0.215	Stable
2218490-3	BAT25	5559	4660	0	0.0266	0.0322	0.0322	Stable
2218490-3	BAT26	396	180	0	0.1334	0.1974	0.1974	Stable
2218490-3	NR21	1032	601	1	0.0349	0.0579	1.0579	Stable
2218490-3	NR24	34719	32961	0	0.0119	0.0021	0.0119	Stable
2218490-3	MONO27	68173	51791	0	0.0075	0.0104	0.0104	Stable
2221241-10	BAT25	3859	5941	0	0.0183	0.024	0.024	Stable
2221241-10	BAT26	140	119	0	0.1019	0.015	0.1019	Stable
2221241-10	NR21	618	600	1	0.0446	0.0335	1.0446	Stable
2221241-10	NR24	27336	18870	0	0.0112	0.0014	0.0112	Stable
2221241-10	MONO27	43008	32051	1	0.0105	0.0381	1.0381	Stable
22P	BAT25	6443	9627	0	0.0127	0.0003	0.0127	Stable
22P	BAT26	887	600	1	0.0566	0.0178	1.0566	Stable
22P	NR21	1489	2015	0	0.0374	0.0581	0.0581	Stable
22P	NR24	99409	50456	0	0.0124	0.0454	0.0454	Stable
22P	MONO27	115814	56161	0	0.0068	0.0083	0.0083	Stable
23P	BAT25	9085	8582	0	0.0449	0.004	0.0449	Stable
23P	BAT26	830	934	0	0.0346	0.0325	0.0346	Stable
23P	NR21	1758	1335	0	0.0409	0.0764	0.0764	Stable
23P	NR24	42074	76738	0	0.0111	0.0475	0.0475	Stable
23P	MONO27	37172	59225	0	0.0335	0.0535	0.0535	Stable
24P	BAT25	4092	4378	0	0.0123	0.0054	0.0123	Stable
24P	BAT26	855	285	1	0.0817	0.2417	1.2417	Unstable
24P	NR21	1228	949	1	0.0326	0.0264	1.0326	Stable
24P	NR24	51619	26321	0	0.0108	0.0111	0.0111	Stable
24P	MONO27	44346	26149	0	0.0098	0.0096	0.0098	Stable
25P	BAT25	14083	8574	0	0.0103	0.006	0.0103	Stable
25P	BAT26	723	510	0	0.0549	0.1351	0.1351	Stable
25P	NR21	2650	1876	1	0.0197	0.0048	1.0197	Stable
25P	NR24	59589	56594	0	0.0054	0.007	0.007	Stable
25P	MONO27	67782	62603	0	0.0057	0.001	0.0057	Stable
26P	BAT25	3478	8637	1	0.0969	0.0434	1.0969	Stable
26P	BAT26	595	657	0	0.0196	0.0018	0.0196	Stable
26P	NR21	1001	3480	0	0.0257	0.0072	0.0257	Stable
26P	NR24	62621	50075	0	0.0275	0.0148	0.0275	Stable
26P	MONO27	62673	55527	0	0.0127	0.0304	0.0304	Stable
27P	BAT25	4904	8867	2	0.1622	0.2644	2.2644	Unstable
27P	BAT26	1370	369	5	0.3396	0.4346	5.4346	Unstable
27P	NR21	1151	1609	1	0.0285	0.029	1.029	Stable
27P	NR24	87735	51652	0	0.0073	0.0056	0.0073	Stable
27P	MONO27	116945	50157	0	0.0151	0.0617	0.0617	Stable
28P	BAT25	3685	5886	0	0.018	0.0292	0.0292	Stable
28P	BAT26	866	625	1	0.0468	0.0679	1.0679	Stable
28P	NR21	989	1962	0	0.0273	0.017	0.0273	Stable
28P	NR24	99837	60062	0	0.0161	0.0122	0.0161	Stable
28P	MONO27	91202	64448	0	0.0171	0.0715	0.0715	Stable
29P	BAT25	7274	6342	0	0.0216	0.0056	0.0216	Stable
29P	BAT26	818	558	1	0.0512	0.044	1.0512	Stable
29P	NR21	1754	1330	0	0.0316	0.0025	0.0316	Stable
29P	NR24	88873	42350	0	0.0105	0.0053	0.0105	Stable
29P	MONO27	88772	42036	0	0.0069	0.0365	0.0365	Stable
30P	BAT25	7128	12602	0	0.0077	0.0098	0.0098	Stable
30P	BAT26	1018	398	0	0.0358	0.0496	0.0496	Stable
30P	NR21	1551	1985	0	0.0246	0.0072	0.0246	Stable
30P	NR24	125833	55763	0	0.0067	0.0117	0.0117	Stable
30P	MONO27	143958	53012	0	0.0117	0.0147	0.0147	Stable
31P	BAT25	7041	13840	0	0.0162	0.0173	0.0173	Stable
31P	BAT26	774	605	0	0.035	0.0152	0.035	Stable
31P	NR21	2183	3609	1	0.0332	0.0258	1.0332	Stable
31P	NR24	66374	31864	0	0.0267	0.0107	0.0267	Stable
31P	MONO27	92674	24300	0	0.0119	0.0129	0.0129	Stable
32P	BAT25	7987	4802	0	0.014	0.0271	0.0271	Stable
32P	BAT26	605	989	1	0.0447	0.0015	1.0447	Stable
32P	NR21	2164	1343	0	0.031	0.0207	0.031	Stable
32P	NR24	77517	70434	0	0.0304	0.0322	0.0322	Stable
32P	MONO27	72878	46109	0	0.0151	0.061	0.061	Stable
33P	BAT25	10919	8573	0	0.0221	0.0039	0.0221	Stable
33P	BAT26	550	382	0	0.0593	0.0078	0.0593	Stable
33P	NR21	1881	1513	0	0.0537	0.0391	0.0537	Stable
33P	NR24	27894	59163	0	0.0078	0.0091	0.0091	Stable
33P	MONO27	34970	73945	0	0.0399	0.008	0.0399	Stable
34P	BAT25	18104	5415	0	0.023	0.0172	0.023	Stable
34P	BAT26	699	494	0	0.0694	0.0274	0.0694	Stable
34P	NR21	2548	1415	0	0.0294	0.0396	0.0396	Stable
34P	NR24	58584	47908	0	0.0403	0.0425	0.0425	Stable
34P	MONO27	100252	49320	0	0.0142	0.0615	0.0615	Stable
35P	BAT25	18019	11005	0	0.0133	0.0051	0.0133	Stable
35P	BAT26	690	710	0	0.0516	0.0593	0.0593	Stable
35P	NR21	2375	1471	0	0.0357	0.0285	0.0357	Stable
35P	NR24	41929	69531	0	0.0124	0.0062	0.0124	Stable
35P	MONO27	44093	62608	0	0.0046	0.0044	0.0046	Stable
37P	BAT25	11623	15657	0	0.0191	0.0101	0.0191	Stable
37P	BAT26	428	466	0	0.0786	0.079	0.079	Stable
37P	NR21	2312	2735	0	0.0101	0.0047	0.0101	Stable
37P	NR24	37570	44909	0	0.023	0.0615	0.0615	Stable
37P	MONO27	44727	45423	0	0.0069	0.0411	0.0411	Stable
38P	BAT25	13370	10992	0	0.0939	0.1601	0.1601	Stable
38P	BAT26	569	384	4	0.0623	0.1464	4.1464	Unstable
38P	NR21	2044	2096	1	0.0419	0.0334	1.0419	Stable
38P	NR24	29801	25602	0	0.0826	0.0695	0.0826	Stable
38P	MONO27	35058	25995	0	0.0178	0.0559	0.0559	Stable
39P	BAT25	2468	9908	0	0.0361	0.0306	0.0361	Stable
39P	BAT26	774	492	1	0.057	0.1376	1.1376	Unstable
39P	NR21	724	1624	1	0.0401	0.0565	1.0565	Stable
39P	NR24	133952	35903	0	0.0192	0.0112	0.0192	Stable
39P	MONO27	120342	26767	0	0.0178	0.0333	0.0333	Stable
40P	BAT25	10973	9033	0	0.0167	0.016	0.0167	Stable
40P	BAT26	1077	422	0	0.0802	0.0677	0.0802	Stable
40P	NR21	1842	1433	1	0.0342	0.0083	1.0342	Stable
40P	NR24	32828	31901	0	0.0114	0.0115	0.0115	Stable
40P	MONO27	53501	32239	0	0.0931	0.066	0.0931	Stable
41P	BAT25	11164	8212	5	0.1848	0.5046	5.5046	Unstable
41P	BAT26	1079	386	5	0.186	0.4592	5.4592	Unstable
41P	NR21	2367	1266	7	0.2721	0.6441	7.6441	Unstable
41P	NR24	55826	46799	0	0.0628	0.1588	0.1588	Stable
41P	MONO27	43262	44604	9	0.1282	0.5347	9.5347	Unstable
42P	BAT25	7090	3988	0	0.0864	0.1156	0.1156	Stable
42P	BAT26	296	116	1	0.6768	0.5821	1.6768	Unstable
42P	NR21	1089	622	1	0.2214	0.0857	1.2214	Unstable
42P	NR24	53233	99930	0	0.0501	0.0216	0.0501	Stable
42P	MONO27	21632	51566	0	0.0725	0.0587	0.0725	Stable
44P	BAT25	3816	6149	0	0.0232	0.0036	0.0232	Stable
44P	BAT26	864	659	0	0.0665	0.069	0.069	Stable
44P	NR21	1229	1518	0	0.0242	0.0623	0.0623	Stable
44P	NR24	74195	56185	0	0.0042	0.0041	0.0042	Stable
44P	MONO27	61339	54584	0	0.005	0.0042	0.005	Stable
45P	BAT25	9728	11553	4	0.3648	0.5922	4.5922	Unstable
45P	BAT26	707	863	4	0.384	0.4267	4.4267	Unstable
45P	NR21	1474	2271	2	0.2476	0.3871	2.3871	Unstable
45P	NR24	42534	56764	0	0.2476	0.4452	0.4452	Stable
45P	MONO27	50451	52122	1	0.2555	0.4798	1.4798	Unstable
46P	BAT25	4585	6452	0	0.0403	0.0007	0.0403	Stable
46P	BAT26	927	599	0	0.0256	0.0215	0.0256	Stable
46P	NR21	1268	1476	0	0.0378	0.0284	0.0378	Stable
46P	NR24	90691	38957	0	0.0127	0.0125	0.0127	Stable
46P	MONO27	75684	33526	0	0.0046	0.0458	0.0458	Stable
47P	BAT25	3854	10961	0	0.0129	0.0179	0.0179	Stable
47P	BAT26	374	584	0	0.0513	0.0471	0.0513	Stable
47P	NR21	1070	1995	0	0.0274	0.0961	0.0961	Stable
47P	NR24	50904	37901	0	0.0051	0.0022	0.0051	Stable
47P	MONO27	61687	27615	0	0.0089	0.036	0.036	Stable
48P	BAT25	6131	7560	0	0.0136	0.0422	0.0422	Stable
48P	BAT26	846	543	1	0.0629	0.0455	1.0629	Stable
48P	NR21	1608	1920	0	0.0149	0.0061	0.0149	Stable
48P	NR24	58240	55743	0	0.0124	0.0001	0.0124	Stable
48P	MONO27	54322	45486	0	0.0062	0.0024	0.0062	Stable
49P	BAT25	5369	10520	0	0.0227	0.0189	0.0227	Stable
49P	BAT26	433	509	0	0.0348	0.0774	0.0774	Stable
49P	NR21	1252	1933	0	0.0265	0.0199	0.0265	Stable
49P	NR24	77935	46611	0	0.0333	0.025	0.0333	Stable
49P	MONO27	75821	48617	0	0.014	0.0262	0.0262	Stable
50P	BAT25	1542	768	3	0.3805	0.1682	3.3805	Unstable
50P	BAT26	1716	610	5	0.4206	0.5348	5.5348	Unstable
50P	NR21	3248	2378	1	0.1385	0.1929	1.1929	Unstable
50P	NR24	42969	32742	4	0.5767	0.2982	4.5767	Unstable
50P	MONO27	39947	35202	2	0.2469	0.0646	2.2469	Unstable
51P	BAT25	1661	1452	0	0.0608	0.0298	0.0608	Stable
51P	BAT26	1273	720	0	0.0704	0.237	0.237	Stable
51P	NR21	5324	4229	0	0.0389	0.155	0.155	Stable
51P	NR24	36735	30026	0	0.0247	0.0232	0.0247	Stable
51P	MONO27	47755	28425	1	0.0204	0.0633	1.0633	Stable
52P	BAT25	1766	1415	0	0.0456	0.0297	0.0456	Stable
52P	BAT26	1028	818	1	0.0496	0.1909	1.1909	Unstable
52P	NR21	5607	4246	0	0.0135	0.0065	0.0135	Stable
52P	NR24	30339	27929	0	0.0109	0.0064	0.0109	Stable
52P	MONO27	48059	34095	0	0.0062	0.0056	0.0062	Stable
53P	BAT25	1154	3006	0	0.0359	0.0284	0.0359	Stable
53P	BAT26	1032	949	0	0.0294	0.031	0.031	Stable
53P	NR21	2866	6732	0	0.0163	0.0042	0.0163	Stable
53P	NR24	41875	21997	0	0.0077	0.0019	0.0077	Stable
53P	MONO27	48557	25467	0	0.0226	0.0203	0.0226	Stable
54P	BAT25	519	1715	0	0.0297	0.0964	0.0964	Stable
54P	BAT26	384	662	1	0.0547	0.0869	1.0869	Stable
54P	NR21	2181	4646	0	0.0198	0.0159	0.0198	Stable
54P	NR24	14615	23084	0	0.0105	0.0085	0.0105	Stable
54P	MONO27	18692	24790	0	0.0199	0.0265	0.0265	Stable
55P	BAT25	532	1177	0	0.0443	0.0167	0.0443	Stable
55P	BAT26	1599	585	0	0.0541	0.0224	0.0541	Stable
55P	NR21	1348	2923	0	0.0551	0.0347	0.0551	Stable
55P	NR24	71347	22015	0	0.0476	0.0171	0.0476	Stable
55P	MONO27	91868	40893	0	0.0202	0.0021	0.0202	Stable
56P	BAT25	909	799	0	0.0732	0.0073	0.0732	Stable
56P	BAT26	1229	704	0	0.0542	0.1944	0.1944	Stable
56P	NR21	2183	2211	0	0.023	0.0216	0.023	Stable
56P	NR24	49341	26664	0	0.033	0.0714	0.0714	Stable
56P	MONO27	72787	22198	0	0.0093	0.0125	0.0125	Stable
57P	BAT25	1124	2246	0	0.0261	0.0509	0.0509	Stable
57P	BAT26	1152	1024	0	0.0444	0.0424	0.0444	Stable
57P	NR21	3439	6005	0	0.019	0.0051	0.019	Stable
57P	NR24	37846	29891	0	0.0147	0.0478	0.0478	Stable
57P	MONO27	42972	33056	0	0.0071	0.0439	0.0439	Stable
58P	BAT25	1755	3703	0	0.0277	0.0186	0.0277	Stable
58P	BAT26	1222	1029	0	0.0155	0.0025	0.0155	Stable
58P	NR21	4759	8370	1	0.0106	0.0399	1.0399	Stable
58P	NR24	66975	28494	0	0.0105	0.0173	0.0173	Stable
58P	MONO27	73809	45928	0	0.0118	0.0155	0.0155	Stable
59P	BAT25	1462	2449	0	0.0247	0.0004	0.0247	Stable
59P	BAT26	909	714	0	0.038	0.0041	0.038	Stable
59P	NR21	3835	5184	0	0.0136	0.0014	0.0136	Stable
59P	NR24	27452	21828	0	0.0171	0.067	0.067	Stable
59P	MONO27	44144	33317	0	0.0073	0.0904	0.0904	Stable
60P	BAT25	1052	1238	0	0.1635	0.0037	0.1635	Stable
60P	BAT26	742	455	11	0.6302	0.2067	11.6302	Unstable
60P	NR21	2920	3099	0	0.2209	0.1746	0.2209	Stable
60P	NR24	39826	16958	0	0.085	0.1019	0.1019	Stable
60P	MONO27	23493	10580	5	0.3316	0.2634	5.3316	Unstable
61P	BAT25	867	2327	0	0.1389	0.0941	0.1389	Stable
61P	BAT26	1698	642	10	0.5209	0.4892	10.5209	Unstable
61P	NR21	2874	3321	0	0.1571	0.0427	0.1571	Stable
61P	NR24	59692	13178	0	0.0897	0.0502	0.0897	Stable
61P	MONO27	80698	19834	6	0.2355	0.3061	6.3061	Unstable
63P	BAT25	1531	2905	0	0.0342	0.051	0.051	Stable
63P	BAT26	839	587	0	0.078	0.3882	0.3882	Stable
63P	NR21	3932	5460	0	0.017	0.0013	0.017	Stable
63P	NR24	30399	15295	0	0.0178	0.0148	0.0178	Stable
63P	MONO27	35271	27266	0	0.0115	0.055	0.055	Stable
64P	BAT25	135	1565	0	0.1349	0.0661	0.1349	Stable
64P	BAT26	1188	262	9	0.0908	0.1942	9.1942	Unstable
64P	NR21	318	2616	0	0.073	0.1942	0.1942	Stable
64P	NR24	52343	17715	0	0.0092	0.0132	0.0132	Stable
64P	MONO27	29349	9733	0	0.0228	0.0356	0.0356	Stable
65P	BAT25	2817	1515	0	0.0288	0.0879	0.0879	Stable
65P	BAT26	1016	1063	0	0.0706	0.0082	0.0706	Stable
65P	NR21	7116	4977	0	0.0274	0.0212	0.0274	Stable
65P	NR24	25730	26242	0	0.0041	0.0046	0.0046	Stable
65P	MONO27	30153	39135	0	0.0109	0.0957	0.0957	Stable
66P	BAT25	1213	2342	0	0.1063	0.317	0.317	Stable
66P	BAT26	775	730	7	0.1735	0.4968	7.4968	Unstable
66P	NR21	3127	5467	0	0.067	0.1517	0.1517	Stable
66P	NR24	38002	21053	0	0.0658	0.1488	0.1488	Stable
66P	MONO27	62668	30676	1	0.584	0.3297	1.584	Unstable
67P	BAT25	1451	1493	1	0.13	0.1472	1.1472	Unstable
67P	BAT26	1256	735	0	0.0816	0.0097	0.0816	Stable
67P	NR21	6829	4221	4	0.3915	0.4777	4.4777	Unstable
67P	NR24	41149	32634	0	0.149	0.4042	0.4042	Stable
67P	MONO27	58706	33397	6	0.2886	0.5406	6.5406	Unstable
68P	BAT25	1437	1963	0	0.0526	0.0055	0.0526	Stable
68P	BAT26	2450	1475	0	0.0332	0.0171	0.0332	Stable
68P	NR21	3811	5438	0	0.0233	0.06	0.06	Stable
68P	NR24	32427	23875	0	0.0324	0.017	0.0324	Stable
68P	MONO27	36569	44005	0	0.0132	0.0166	0.0166	Stable
69P	BAT25	1755	2478	0	0.0632	0.0434	0.0632	Stable
69P	BAT26	833	850	0	0.0489	0.1749	0.1749	Stable
69P	NR21	3716	7400	0	0.0222	0.0251	0.0251	Stable
69P	NR24	33895	21090	0	0.0111	0.0017	0.0111	Stable
69P	MONO27	50787	29022	0	0.0133	0.0174	0.0174	Stable
71P	BAT25	139	1671	0	0.0748	0.2095	0.2095	Stable
71P	BAT26	1844	689	0	0.0342	0.0389	0.0389	Stable
71P	NR21	418	4416	1	0.0567	0.0414	1.0567	Stable
71P	NR24	104268	24815	0	0.0094	0.009	0.0094	Stable
71P	MONO27	91654	23760	0	0.023	0.0401	0.0401	Stable
73P	BAT25	1880	2598	0	0.0397	0.0777	0.0777	Stable
73P	BAT26	1059	916	0	0.0362	0.0327	0.0362	Stable
73P	NR21	5467	5198	0	0.0172	0.0096	0.0172	Stable
73P	NR24	36407	24890	0	0.0252	0.0552	0.0552	Stable
73P	MONO27	54456	29223	0	0.0142	0.0253	0.0253	Stable
74P	BAT25	603	1823	1	0.3623	0.1851	1.3623	Unstable
74P	BAT26	1021	535	4	1.0521	0.6164	5.0521	Unstable
74P	NR21	2019	5114	0	0.1515	0.147	0.1515	Stable
74P	NR24	33690	21723	0	0.1073	0.1379	0.1379	Stable
74P	MONO27	28139	14609	0	0.0616	0.0151	0.0616	Stable
75P	BAT25	912	1175	0	0.0299	0.0022	0.0299	Stable
75P	BAT26	638	744	0	0.068	0.0468	0.068	Stable
75P	NR21	2401	3380	0	0.0226	0.0324	0.0324	Stable
75P	NR24	49671	27875	0	0.0057	0.0053	0.0057	Stable
75P	MONO27	59051	28591	0	0.0139	0.0073	0.0139	Stable
76P	BAT25	1711	818	0	0.0629	0.0134	0.0629	Stable
76P	BAT26	970	816	0	0.0423	0.0336	0.0423	Stable
76P	NR21	5169	2847	0	0.0122	0.0259	0.0259	Stable
76P	NR24	29062	42322	0	0.0157	0.0217	0.0217	Stable
76P	MONO27	53330	41319	0	0.0168	0.0237	0.0237	Stable
77P	BAT25	819	3110	0	0.0489	0.02	0.0489	Stable
77P	BAT26	1247	1022	1	0.0367	0.13	1.13	Unstable
77P	NR21	2252	7124	0	0.0218	0.0101	0.0218	Stable
77P	NR24	46253	29858	0	0.0119	0.0011	0.0119	Stable
77P	MONO27	63461	35926	0	0.0083	0.0091	0.0091	Stable
78P	BAT25	384	2123	0	0.0632	0.0346	0.0632	Stable
78P	BAT26	1381	645	0	0.0485	0.1195	0.1195	Stable
78P	NR21	666	5572	0	0.052	0.0787	0.0787	Stable
78P	NR24	95499	21596	0	0.0204	0.03	0.03	Stable
78P	MONO27	131689	31722	0	0.03	0.082	0.082	Stable
79P	BAT25	926	3072	0	0.0227	0.0184	0.0227	Stable
79P	BAT26	845	680	0	0.0279	0.021	0.0279	Stable
79P	NR21	2236	5975	0	0.0165	0.0263	0.0263	Stable
79P	NR24	77319	25827	0	0.01	0.0056	0.01	Stable
79P	MONO27	54846	34917	0	0.0284	0.0057	0.0284	Stable
A101	BAT25	11771	14976	1	0.2083	0.2752	1.2752	Unstable
A101	BAT26	1156	548	5	0.3705	0.5222	5.5222	Unstable
A101	NR21	3889	2431	2	0.3192	0.3246	2.3246	Unstable
A101	NR24	50786	39341	1	0.1487	0.175	1.175	Unstable
A101	MONO27	51773	48250	4	0.1961	0.2812	4.2812	Unstable
A102	BAT25	14184	16264	5	0.2298	0.5829	5.5829	Unstable
A102	BAT26	1935	869	10	0.433	0.5355	10.5355	Unstable
A102	NR21	2577	2693	4	0.2157	0.4857	4.4857	Unstable
A102	NR24	48651	51630	4	0.1634	0.596	4.596	Unstable
A102	MONO27	45289	57718	7	0.164	0.692	7.692	Unstable
A44	BAT25	17677	9539	0	0.0081	0.0005	0.0081	Stable
A44	BAT26	1373	1152	0	0.016	0.0037	0.016	Stable
A44	NR21	4485	3306	0	0.0104	0.0016	0.0104	Stable
A44	NR24	38312	36270	0	0.0079	0.0112	0.0112	Stable
A44	MONO27	30944	26640	0	0.0097	0.003	0.0097	Stable
A45	BAT25	8634	14408	0	0.0303	0.075	0.075	Stable
A45	BAT26	702	1396	0	0.0445	0.0073	0.0445	Stable
A45	NR21	3429	5815	0	0.0188	0.0154	0.0188	Stable
A45	NR24	43780	45085	0	0.0094	0.0017	0.0094	Stable
A45	MONO27	38381	40218	0	0.0077	0.003	0.0077	Stable
A46	BAT25	5781	6449	0	0.0153	0.0153	0.0153	Stable
A46	BAT26	1024	1176	0	0.0275	0.0407	0.0407	Stable
A46	NR21	2273	2018	0	0.0168	0.0057	0.0168	Stable
A46	NR24	87512	61608	0	0.0047	0.0007	0.0047	Stable
A46	MONO27	70657	49638	0	0.0043	0.0023	0.0043	Stable
A47	BAT25	9739	11849	0	0.015	0.0086	0.015	Stable
A47	BAT26	1131	1375	0	0.0218	0.0026	0.0218	Stable
A47	NR21	4223	3604	0	0.0177	0.0136	0.0177	Stable
A47	NR24	45529	43266	0	0.0035	0.0001	0.0035	Stable
A47	MONO27	31631	41395	0	0.0093	0.0023	0.0093	Stable
A48	BAT25	7491	8297	0	0.0222	0.003	0.0222	Stable
A48	BAT26	917	886	0	0.0508	0.0527	0.0527	Stable
A48	NR21	3339	4374	0	0.0207	0.0129	0.0207	Stable
A48	NR24	43964	50663	0	0.0059	0.0056	0.0059	Stable
A48	MONO27	30796	42743	0	0.0183	0.0096	0.0183	Stable
A49	BAT25	7931	16328	5	0.188	0.4572	5.4572	Unstable
A49	BAT26	866	1691	9	0.1757	0.6052	9.6052	Unstable
A49	NR21	2778	5905	7	0.1531	0.4524	7.4524	Unstable
A49	NR24	38613	43683	5	0.0939	0.3272	5.3272	Unstable
A49	MONO27	30074	42099	11	0.1372	0.57	11.57	Unstable
A50	BAT25	13657	12942	5	0.181	0.4691	5.4691	Unstable
A50	BAT26	1563	1769	5	0.2269	0.4869	5.4869	Unstable
A50	NR21	5345	4925	1	0.1746	0.3315	1.3315	Unstable
A50	NR24	59014	60382	4	0.1713	0.4748	4.4748	Unstable
A50	MONO27	46925	50408	0	0.145	0.275	0.275	Stable
A54	BAT25	9334	10863	2	0.2951	0.2231	2.2951	Unstable
A54	BAT26	1413	1316	4	0.3126	0.3822	4.3822	Unstable
A54	NR21	3451	3700	2	0.2953	0.1152	2.2953	Unstable
A54	NR24	41090	41584	5	0.2869	0.6319	5.6319	Unstable
A54	MONO27	28530	39674	2	0.2544	0.0775	2.2544	Unstable
A57	BAT25	10838	13434	0	0.0202	0.0089	0.0202	Stable
A57	BAT26	859	1359	0	0.0459	0.0322	0.0459	Stable
A57	NR21	3786	4020	0	0.0154	0.0005	0.0154	Stable
A57	NR24	39849	52617	0	0.0093	0.0019	0.0093	Stable
A57	MONO27	33059	42120	1	0.015	0.0021	1.015	Stable
A58	BAT25	6786	8666	0	0.015	0.0121	0.015	Stable
A58	BAT26	2214	1839	0	0.0285	0.0096	0.0285	Stable
A58	NR21	3480	5246	0	0.1529	0.3112	0.3112	Stable
A58	NR24	102265	78889	0	0.0046	0.0423	0.0423	Stable
A58	MONO27	145947	68606	0	0.0029	0.0036	0.0036	Stable
A59	BAT25	12976	11264	0	0.0071	0.0067	0.0071	Stable
A59	BAT26	987	1211	1	0.0634	0.0351	1.0634	Stable
A59	NR21	2405	4125	0	0.0259	0.0583	0.0583	Stable
A59	NR24	44778	45218	0	0.0775	0.108	0.108	Stable
A59	MONO27	27435	28691	0	0.009	0.0077	0.009	Stable
A61	BAT25	7617	6919	0	0.0165	0.0042	0.0165	Stable
A61	BAT26	925	791	0	0.0264	0.0072	0.0264	Stable
A61	NR21	3107	2998	0	0.0225	0.0164	0.0225	Stable
A61	NR24	59238	29315	0	0.0154	0.0227	0.0227	Stable
A61	MONO27	58859	16759	0	0.0196	0.0106	0.0196	Stable
A62	BAT25	9376	5640	0	0.0212	0.0132	0.0212	Stable
A62	BAT26	1129	1099	0	0.0266	0.0171	0.0266	Stable
A62	NR21	4246	2275	0	0.0166	0.0024	0.0166	Stable
A62	NR24	38924	57109	0	0.0048	0.039	0.039	Stable
A62	MONO27	27863	33866	0	0.011	0.0012	0.011	Stable
A64	BAT25	15512	33659	0	0.0292	0.0457	0.0457	Stable
A64	BAT26	1745	2900	0	0.0345	0.0813	0.0813	Stable
A64	NR21	8545	17640	0	0.029	0.0294	0.0294	Stable
A64	NR24	61939	126589	0	0.0342	0.0459	0.0459	Stable
A64	MONO27	59914	90371	0	0.0425	0.0868	0.0868	Stable
A65	BAT25	12543	24118	0	0.0104	0.0102	0.0104	Stable
A65	BAT26	1361	2072	0	0.0269	0.0046	0.0269	Stable
A65	NR21	5741	8178	0	0.0164	0.0038	0.0164	Stable
A65	NR24	35518	37835	0	0.0125	0.0024	0.0125	Stable
A65	MONO27	46120	96859	0	0.008	0.0035	0.008	Stable
A66	BAT25	10376	24599	0	0.0154	0.0053	0.0154	Stable
A66	BAT26	1298	1447	0	0.0262	0.0445	0.0445	Stable
A66	NR21	8747	8891	0	0.0185	0.0038	0.0185	Stable
A66	NR24	43589	45144	0	0.01	0.0122	0.0122	Stable
A66	MONO27	38614	49651	0	0.0258	0.0204	0.0258	Stable
A67	BAT25	9846	5679	0	0.0232	0.0265	0.0265	Stable
A67	BAT26	1622	1131	1	0.0515	0.0422	1.0515	Stable
A67	NR21	5336	5200	0	0.0179	0.0051	0.0179	Stable
A67	NR24	37172	30172	0	0.0139	0.0102	0.0139	Stable
A67	MONO27	45443	35011	0	0.0106	0.0071	0.0106	Stable
A68	BAT25	6143	5433	0	0.036	0.1016	0.1016	Stable
A68	BAT26	1361	1828	0	0.0547	0.1565	0.1565	Stable
A68	NR21	7728	6124	0	0.0384	0.0029	0.0384	Stable
A68	NR24	70135	62413	0	0.0265	0.0712	0.0712	Stable
A68	MONO27	72424	53931	0	0.0435	0.123	0.123	Stable
A72	BAT25	9987	8743	0	0.0272	0.0347	0.0347	Stable
A72	BAT26	834	978	0	0.0594	0.1319	0.1319	Stable
A72	NR21	7614	5413	0	0.0189	0.0286	0.0286	Stable
A72	NR24	29243	41685	0	0.0153	0.0206	0.0206	Stable
A72	MONO27	49921	44266	0	0.0235	0.0692	0.0692	Stable
A73	BAT25	13063	15747	0	0.0077	0.0009	0.0077	Stable
A73	BAT26	842	1644	0	0.0484	0.0325	0.0484	Stable
A73	NR21	5163	6820	0	0.0295	0.0243	0.0295	Stable
A73	NR24	42483	43501	0	0.005	0.0049	0.005	Stable
A73	MONO27	32451	35715	0	0.004	0.0403	0.0403	Stable
A75	BAT25	7383	10065	0	0.0135	0.0129	0.0135	Stable
A75	BAT26	2084	1465	0	0.0193	0.027	0.027	Stable
A75	NR21	2919	5123	0	0.0249	0.0198	0.0249	Stable
A75	NR24	148854	44129	0	0.0096	0.0146	0.0146	Stable
A75	MONO27	166596	41981	0	0.0064	0.0475	0.0475	Stable
A85	BAT25	13831	23863	0	0.0144	0.0109	0.0144	Stable
A85	BAT26	1839	1526	1	0.0304	0.0295	1.0304	Stable
A85	NR21	8039	9885	0	0.0091	0.0022	0.0091	Stable
A85	NR24	41465	44232	0	0.0099	0.0565	0.0565	Stable
A85	MONO27	40980	79247	0	0.0151	0.0097	0.0151	Stable
A86	BAT25	11995	16689	0	0.2264	0.0538	0.2264	Stable
A86	BAT26	1778	1174	1	0.5249	0.1975	1.5249	Unstable
A86	NR21	17400	15364	1	0.2322	0.0186	1.2322	Unstable
A86	NR24	52472	40985	0	0.032	0.0031	0.032	Stable
A86	MONO27	51389	67548	0	0.355	0.1907	0.355	Stable
A88	BAT25	17092	9119	0	0.0172	0.0035	0.0172	Stable
A88	BAT26	603	509	0	0.0234	0.0079	0.0234	Stable
A88	NR21	3110	2755	1	0.0311	0.0045	1.0311	Stable
A88	NR24	53719	44398	0	0.0103	0.0194	0.0194	Stable
A88	MONO27	46474	28062	0	0.005	0.0116	0.0116	Stable
A89	BAT25	13682	9997	3	0.1283	0.3847	3.3847	Unstable
A89	BAT26	2444	1031	11	0.4186	0.6789	11.6789	Unstable
A89	NR21	3491	2716	8	0.168	0.528	8.528	Unstable
A89	NR24	37277	77612	6	0.1737	0.5805	6.5805	Unstable
A89	MONO27	32275	72138	8	0.1212	0.5065	8.5065	Unstable
A94	BAT25	2070	20092	0	0.0181	0.0159	0.0181	Stable
A94	BAT26	160	641	1	0.1228	0.3241	1.3241	Unstable
A94	NR21	660	3049	0	0.0503	0.0832	0.0832	Stable
A94	NR24	10938	42954	0	0.0187	0.016	0.0187	Stable
A94	MONO27	14510	36923	0	0.0124	0.0087	0.0124	Stable
A95	BAT25	15842	14565	5	0.2492	0.4629	5.4629	Unstable
A95	BAT26	1402	940	4	0.3208	0.5124	4.5124	Unstable
A95	NR21	3743	2291	3	0.2491	0.2914	3.2914	Unstable
A95	NR24	40609	56443	0	0.1099	0.2175	0.2175	Stable
A95	MONO27	34840	70684	3	0.1868	0.3718	3.3718	Unstable
A96	BAT25	24551	15831	4	0.4438	0.1687	4.4438	Unstable
A96	BAT26	914	1167	2	0.2861	0.3758	2.3758	Unstable
A96	NR21	3316	2214	3	0.3574	0.1057	3.3574	Unstable
A96	NR24	48425	40127	2	0.3528	0.1811	2.3528	Unstable
A96	MONO27	49386	38841	4	0.1539	0.1581	4.1581	Unstable
A97	BAT25	26801	30315	0	0.032	0.0808	0.0808	Stable
A97	BAT26	1740	811	0	0.0709	0.0142	0.0709	Stable
A97	NR21	2269	2535	0	0.0316	0.0051	0.0316	Stable
A97	NR24	46387	52729	0	0.0102	0.0133	0.0133	Stable
A97	MONO27	115130	58334	0	0.0065	0.0331	0.0331	Stable
